# Supplementary material
Source: HighWire-hosted journal article supplement (https://heart.bmj.com/content/105/15/1136)
Supplement: inline-supplementary-material-1 [file inline-supplementary-material-1.docx]

**Supplement Table –**

| **BBB type/ Study** | **Sample size** | **Number of patients** | **Follow-up (months)** | **Outcomes measured** | **Conclusions**  **(Studies with increased risk are highlighted in yellow)** |
| --- | --- | --- | --- | --- | --- |
| **RBBB** |  |  |  |  |  |
| Schneider JF, 19801 | 5209 | 70 | 216 | Cardiac morbidity and mortality | Increased cardiac morbidity and mortality |
| Thrainsdottir S, 19932 | 18,762  (>33 years) | 126 M, 67 F | - | Cardiac morbidity and mortality | Increased cardiac morbidity but not mortality |
| Fahy GJ, 19963 | 110,000 | 198 | 114 | All-cause mortality, cardiac death | Negative |
| Taniguchi M, 20034 | 2,722 men  (>53 yrs, pilots) | 36 | 131 | All-cause mortality | Negative |
| Eriksson P, 20055 | 7,392 men,  (>50 yrs) | 70 | 336 | All-cause mortality, cardiac death, MI, HF | Negative. HR for progression to high degree AV block: 3.64 (99% CI, 0.79-16.72) |
| Miller WL, 20086 | 104,580,  (mean 64 yrs) | 300 | 108 | Cardiac morbidity and mortality | Increased risk |
| Aro AL, 20117 | 10,899,  (mean 44 yrs) | 44 | 360 | All-cause mortality, cardiac death, arrhythmic death | Negative |
| Zhang ZM, 20128 | 53,694 women  (mean 62 yrs) | 572 | 168 | All-cause mortality, cardiac death | Negative |
| Bussink, BE, 20139 | 18,441  (>20 yrs) | 119 M, 47 F | 246 | All-cause mortality, cardiac death, MI, HF, PPM insertion | Increased cardiovascular risk and all-cause mortality. HR for PPM insertion: 2.17 (95% CI, 1.22-3.86) |
| Haataja P, 201510 | 6299 | 46 M, 23 F | 98 | All-cause mortality, cardiac death | Negative |
| Rasmussen P, 201911 (present study) | 202,268 | 2,297 M, 1213 F | 93 | All-cause mortality, cardiac death, HF, MI, PPM insertion, AF | Increased risk of HF, PPM. Increased risk of cardiac death in men only, but not all-cause mortality |
| **LBBB** |  |  |  |  |  |
| Schneider JF, 197912 | 5209 | 55 | 216 | Cardiac morbidity and mortality | Increased cardiac morbidity and mortality |
| Fahy GJ, 19963 | 110,000 | 112 | 114 | All-cause mortality, cardiac death | Increased cardiac death, but not all-cause mortality |
| Eriksson P, 20055 | 7,392 men  (>50 yrs) | 46 | 336 | All-cause mortality, cardiac death, MI, HF | Increased cardiac death, MI, HF. HR for progression to high degree AV block: 12.89 (99% CI, 4.13-40.24) |
| Miller WL, 20086 | 104,580  (mean 64 yrs) | 220 | 108 | Cardiac morbidity and mortality | Increased risk. LBBB + LAD was associated with worse outcomes compared with LBBB alone |
| Aro AL, 20117 | 10,899  (mean 44 yrs) | 33 | 360 | All-cause mortality, cardiac death, arrhythmic death | Increased arrhythmic death, but not all-cause mortality or cardiac death |
| Zhang ZM, 20128 | 53,694 women  (mean 62 yrs) | 408 | 168 | All-cause mortality, cardiac death | Increased cardiac death, but not all-cause mortality |
| Haataja P, 201510 | 6299 | 29M, 31F | 98 | All-cause mortality, cardiac death | Increased all-cause mortality and cardiac death |
| Rasmussen P, 2019 11  (present study) | 202,268  (>40 yrs) | 358M, 679F | 93 | All-cause mortality, cardiac death, HF, MI, PPM insertion, AF | Increased risk of HF, MI, PPM. Increased risk of cardiac death and all-cause mortality in men only |
| **IVCD** |  |  |  |  |  |
| Aro AL, 20117 | 10,899  (mean 44 yrs) | 67 | 360 | All-cause mortality, cardiac death, arrhythmic death | Increased arrhythmic death, all-cause mortality and cardiac death |
| Haataja P, 201510 | 6299 | 33 M, 3 F | 98 | All-cause mortality, cardiac death | Increased all-cause mortality and cardiac death |
| Rasmussen P, 2019 11  (present study) | 202,268  (> 40 yrs) | 1979 M, 1071 F | 93 | All-cause mortality, cardiac death, HF, MI, PPM insertion, AF | Increased risk of HF, MI, PPM. Increased risk of cardiac death and all-cause mortality in both men and women |

**References**

1. Schneider JF, Thomas HE, Kreger BE, et al. Newly acquired right bundle-branch block: The Framingham Study. *Annals of internal medicine* 1980;92(1):37-44. [published Online First: 1980/01/01]

2. Thrainsdottir IS, Hardarson T, Thorgeirsson G, et al. The epidemiology of right bundle branch block and its association with cardiovascular morbidity--the Reykjavik Study. *Eur Heart J* 1993;14(12):1590-6. [published Online First: 1993/12/01]

3. Fahy GJ, Pinski SL, Miller DP, et al. Natural history of isolated bundle branch block. *Am J Cardiol* 1996;77(14):1185-90.

4. Taniguchi M, Nakano H, Kuwahara K, et al. Prognostic and clinical significance of newly acquired complete right bundle branch block in Japan Airline pilots. *Internal medicine (Tokyo, Japan)* 2003;42(1):21-4. [published Online First: 2003/02/14]

5. Eriksson P, Wilhelmsen L, Rosengren A. Bundle-branch block in middle-aged men: risk of complications and death over 28 years. The Primary Prevention Study in Göteborg, Sweden. *Eur Heart J* 2005;26(21):2300-6. doi: 10.1093/eurheartj/ehi580 [published Online First: 2005/10/07]

6. Miller WL, Hodge DO, Hammill SC. Association of uncomplicated electrocardiographic conduction blocks with subsequent cardiac morbidity in a community-based population (Olmsted County, Minnesota). *Am J Cardiol* 2008;101(1):102-6. doi: 10.1016/j.amjcard.2007.07.056

7. Aro AL, Anttonen O, Tikkanen JT, et al. Intraventricular conduction delay in a standard 12-lead electrocardiogram as a predictor of mortality in the general population. *Circ Arrhythm Electrophysiol* 2011;4(5):704-10. doi: 10.1161/CIRCEP.111.963561 [published Online First: 2011/08/13]

8. Zhang ZM, Rautaharju PM, Soliman EZ, et al. Mortality risk associated with bundle branch blocks and related repolarization abnormalities (from the Women's Health Initiative [WHI]). *Am J Cardiol* 2012;110(10):1489-95. doi: 10.1016/j.amjcard.2012.06.060 [published Online First: 2012/08/02]

9. Bussink BE, Holst AG, Jespersen L, et al. Right bundle branch block: prevalence, risk factors, and outcome in the general population: results from the Copenhagen City Heart Study. *Eur Heart J* 2013;34(2):138-46. doi: 10.1093/eurheartj/ehs291 [published Online First: 2012/09/04]

10. Haataja P, Anttila I, Nikus K, et al. Prognostic implications of intraventricular conduction delays in a general population: the Health 2000 Survey. *Annals of medicine* 2015;47(1):74-80. doi: 10.3109/07853890.2014.985704

10.3109/07853890.2014.985704. Epub 2015 Jan 22. [published Online First: 2015/01/24]

11. Rasmussen Peter M, Skov, Morton, Ghouse Jouse, Pietersen Adrian, Hansen Steen, Torp-Pedersen Christian, Køber Lars, Haunsø Stig, Morten Salling Olesen, Jesper Hastrup, Svendsen, Jacob Melgaard, Claus Graff, Anders Gaarsdal Holst, Jonas Bille Nielsen. Clinical implications of electrocardiographic bundle branch block in primary care. *Heart* 2019

12. Schneider JF, Thomas HE, Jr., Kreger BE, et al. Newly acquired left bundle-branch block: the Framingham study. *Annals of internal medicine* 1979;90(3):303-10. [published Online First: 1979/03/01]
